# Supplementary material
Source: PubMed Central journal article supplement (PMC4987196)
Supplement: NIHMS775783-supplement-2.pdf [file NIHMS775783-supplement-2.pdf]

## **Supplementary Tables**

**Supplementary Table 1.** LD<sub>50</sub> concentrations of different agents (determined at 48h) are indicated. Also shown are agents used at 10μM.

**Supplementary Table 2.** Probe sets showing 2-fold difference in expression in 2 independent experiments with romidepsin treatment of LKR. Probe sets with very low expression (cutoff of <100 under all tested conditions) were removed. Probe set ID, direction of change after romidepsin treatment, accession number and gene symbol when available are indicated.
